# Supplementary material for: 3D-Printable Hierarchical Nanogel-GelMA Composite Hydrogel System
Source: MDPI journal article supplement (doi:10.3390/polym13152508), 2021-07-29
Supplement: s1 [file polymers-1312863-supplementary.pdf › polymers-1312863-supplementary.pdf]

Article

# 3D-Printable Hierarchical Nanogel-GelMA Composite Hydrogel System

Guangyue Zu <sup>1</sup>, Marnix Meijer <sup>1</sup>, Olga Mergel <sup>1</sup>, Heng Zhang <sup>2</sup> and Patrick van Rijn <sup>1,2 \*</sup>

<sup>1</sup> Department of Biomedical Engineering, W. J. Kolff Institute for Biomedical Engineering and Materials Science, University of Groningen and University Medical Center Groningen, A. Deusinglaan 1, 9713 AV, Groningen, The Netherlands

<sup>2</sup> Zernike Institute for Advanced Materials, University of Groningen, Nijenborgh 4, 9747 AG Groningen, The Netherlands

\* Correspondence: p.van.rijn@umcg.nl

## Supplementary Materials

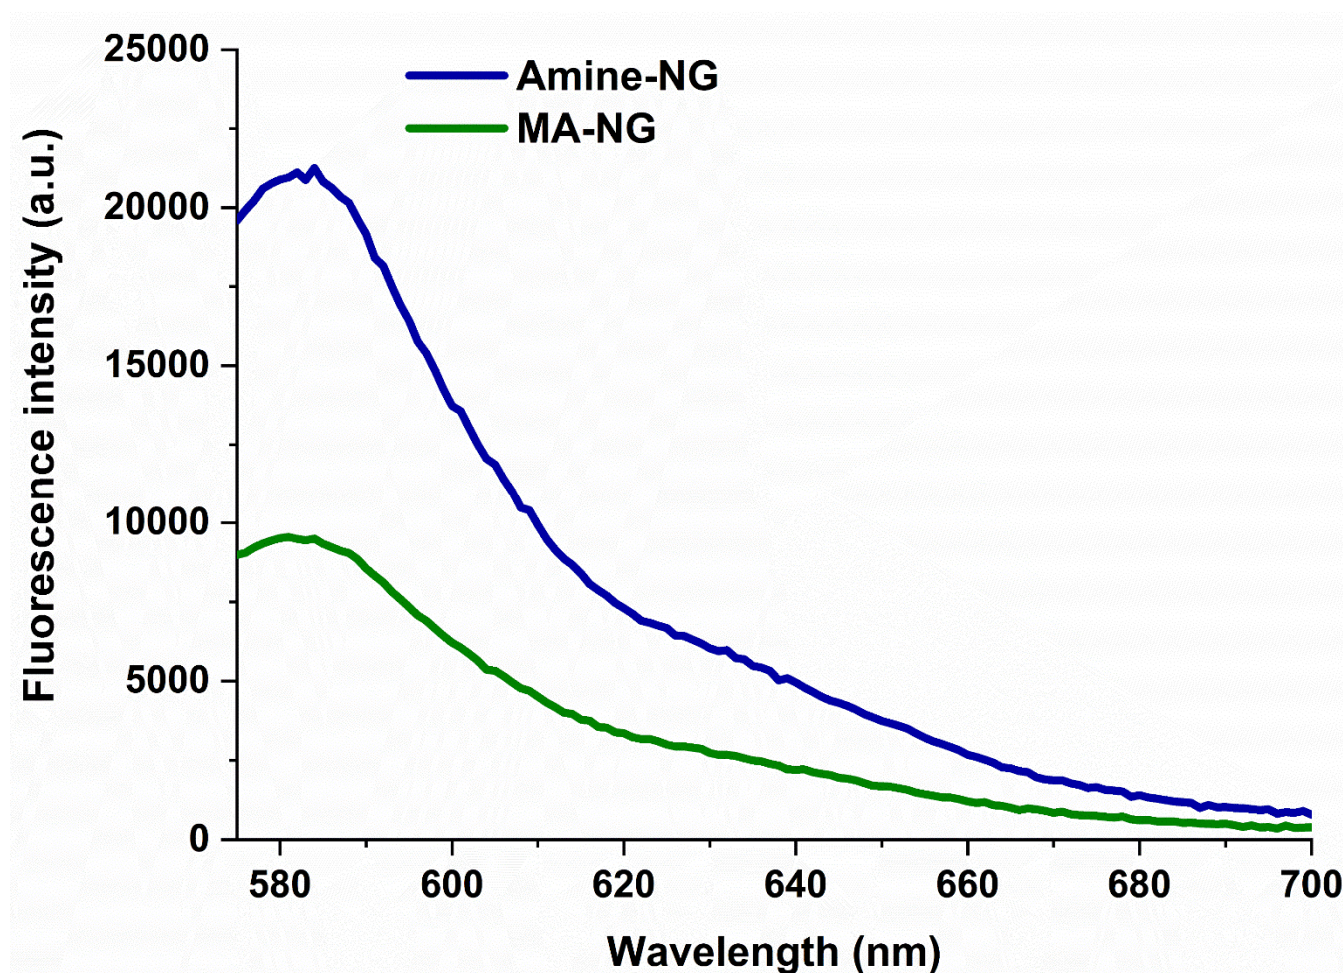

Figure S1. Fluorescence spectra of Amine-NG and MA-NG in water.
